# Supplementary material for: The first map of dominant crop sequences in the European Union over 2012–2018
Source: Copernicus journal article supplement (doi:10.5194/essd-2022-300), 2022-10-10
Supplement: Supplementary file 1 [file essd-2022-300-supplement.pdf]

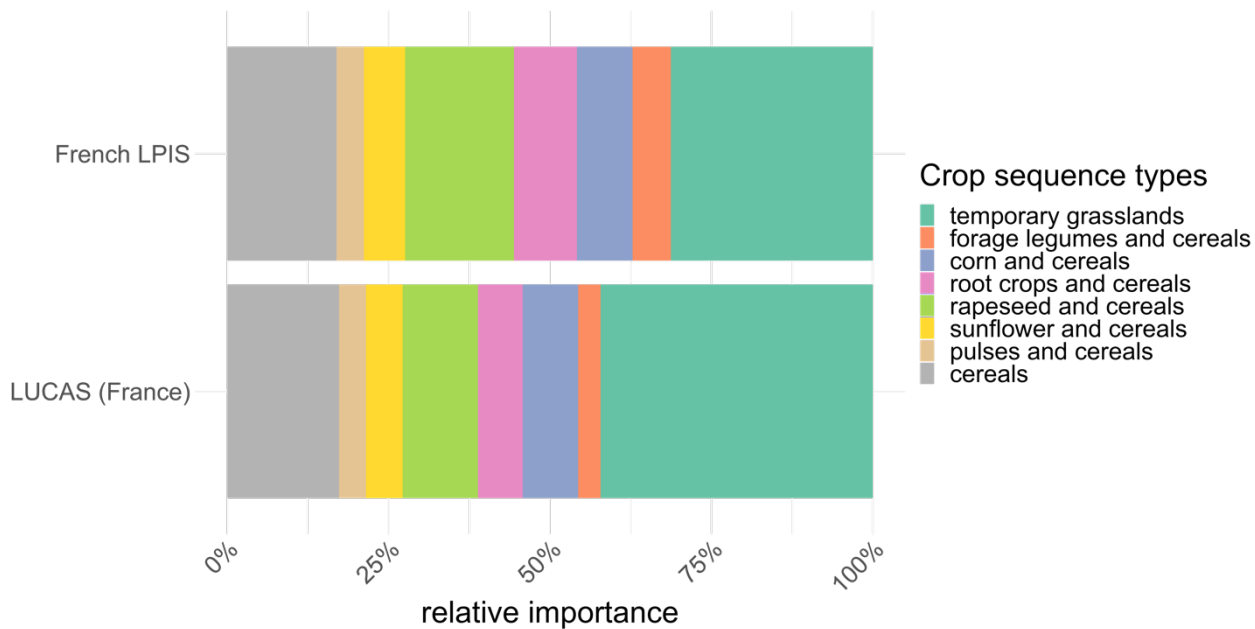

**Figure S1. Comparison of the relative importance of crop sequence types derived from the LUCAS and French LPIS datasets at the national scale in France**

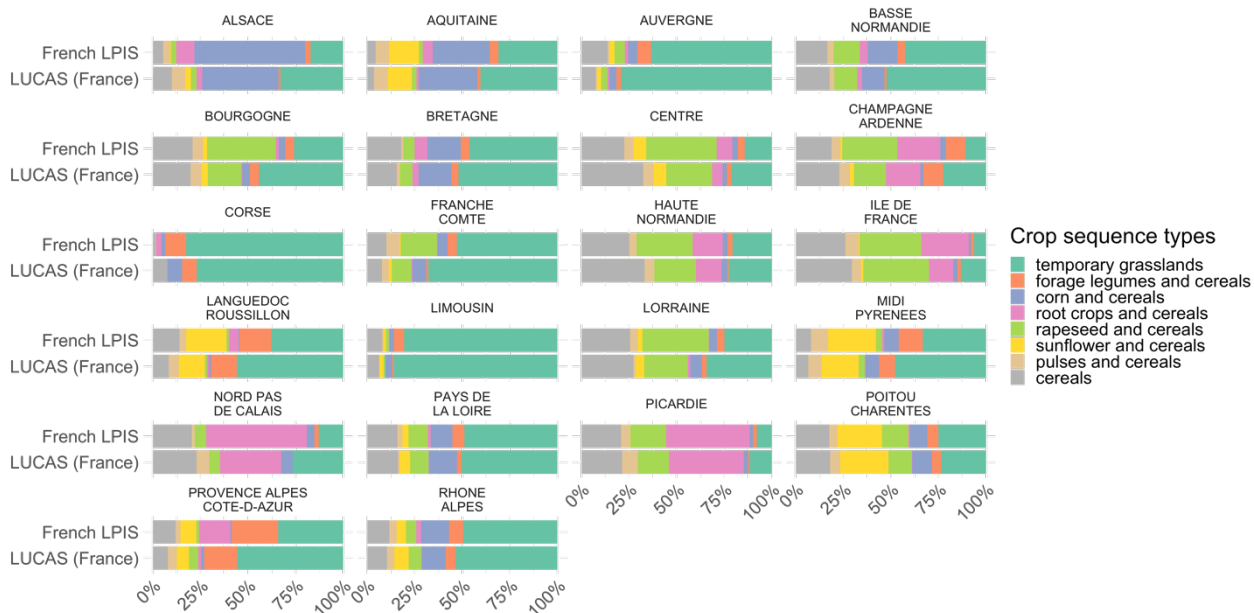

5

**Figure S2. Comparison of the relative importance of crop sequence types derived from the LUCAS and French LPIS datasets for each of the 22 regions in France**

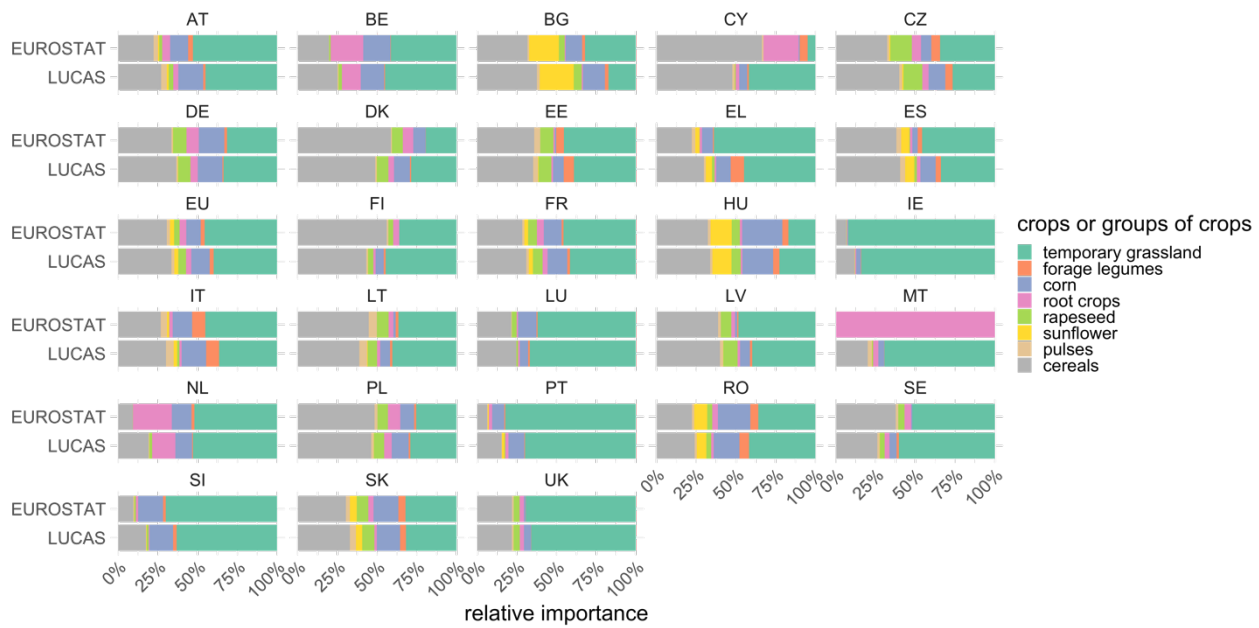

10 **Figure S3. Comparison of the relative importance of crops / groups of crops in arable land, derived from crop sequence types relative importance and characteristics from LUCAS dataset or land use from EUROSTAT dataset for each country in the EU.**
